# Supplementary material
Source: PubMed Central journal article supplement (PMC4505505)
Supplement: supp_M114.621706_jbc.M114.621706-1.pdf [file supp_M114.621706_jbc.M114.621706-1.pdf]

**SUPPLEMENTARY MATERIAL**

**Unbiased cell-based screening in a neuronal cell model of Batten disease highlights an interaction between Ca<sup>2+</sup> homeostasis, autophagy, and CLN3 function**

Uma Chandrachud<sup>1</sup>, Mathew W. Walker<sup>2</sup>, Alexandra M. Simas<sup>1</sup>, Sasja Heetveld<sup>1</sup>, Anton Petcherski<sup>1,3</sup>, Madeleine Klein<sup>1</sup>, Hyejin Oh<sup>1</sup>, Pavlina Wolf<sup>1</sup>, Wen-Ning Zhao<sup>1</sup>, Stephanie Norton<sup>1</sup>, Stephen J. Haggarty<sup>1</sup>, Emyr Lloyd-Evans<sup>2</sup>, Susan L. Cotman<sup>1</sup>

<sup>1</sup>*Center for Human Genetic Research, Massachusetts General Hospital, Harvard Medical School, Boston, MA 02114 USA*

<sup>2</sup>*Sir Martin Evans Building, School of Biosciences, Cardiff University, Cardiff, CF10 3AX, UK*

<sup>3</sup>*NeuroToponomics Group, Center for Membrane Proteomics, Goethe Universität Frankfurt am Main, 60438, Frankfurt am Main, Germany*

\*Running title: *Identification of autophagy modifiers in Batten disease*

To whom correspondence should be addressed: Susan L. Cotman, Center for Human Genetic Research, Department of Neurology, 185 Cambridge St., Boston, MA, USA, Tel.: (617) 726-9180; Fax: (617) 643-3203; E-mail: cotman@helix.mgh.harvard.edu

---

**LEGENDS TO SUPPLEMENTARY FIGURES:**

***Supplementary Figure 1: Follow-up dose response for hit compounds:***

Left columns ('Nuclei'): Graphs of nuclear count (y-axis) for each follow-up dose (x-axis,  $\mu\text{M}$ ) tested are shown in the left set of plots for the indicated compounds, which are provided as an indication of the relative toxicity following the compound dose-response experiment. Right columns ('GFP-LC3 vesicle count per cell'): Graphs of mean vesicle count/cell (y-axis) for each follow-up dose tested (x-axis,  $\mu\text{M}$ ) are shown in the right set of plots for the indicated compounds. The gray line shown in each graph represents the mean for DMSO-treated wells, and the dashed lines represent  $\pm$  two standard deviations from the mean.

## Nuclei

## GFP-LC3 vesicle count per cell

*CbCln3<sup>+/+</sup>**CbCln3<sup>Δex7/8/Δex7/8</sup>**CbCln3<sup>+/+</sup>**CbCln3<sup>Δex7/8/Δex7/8</sup>*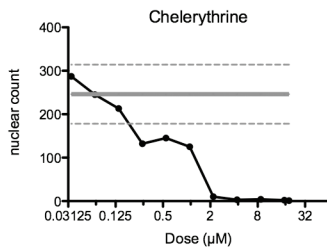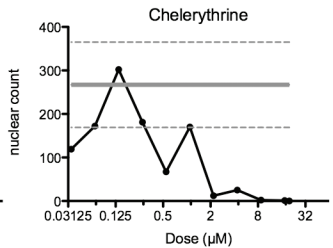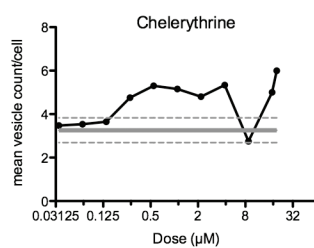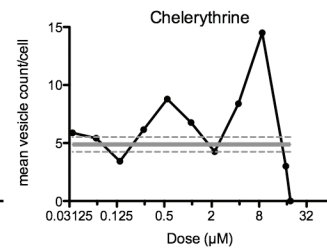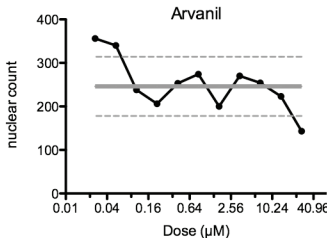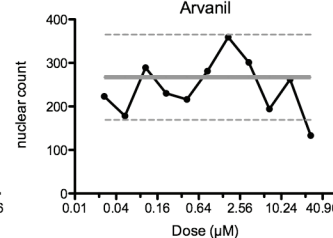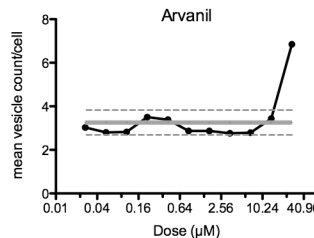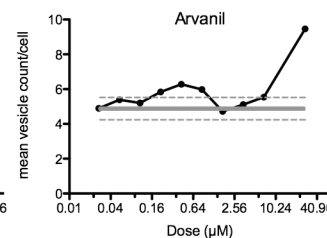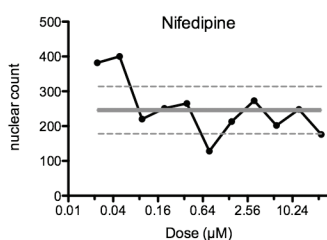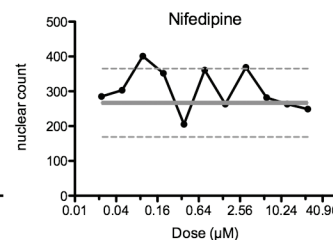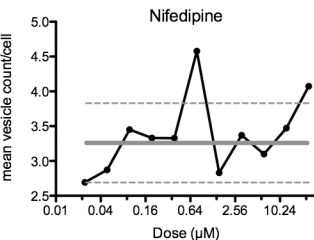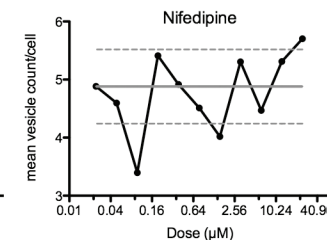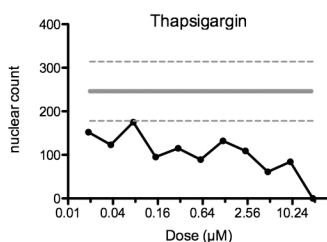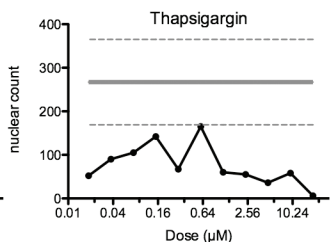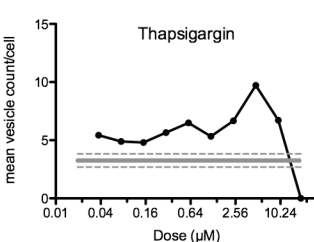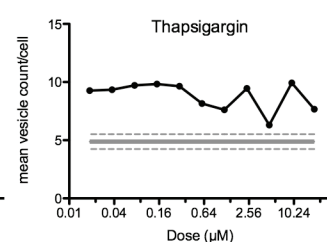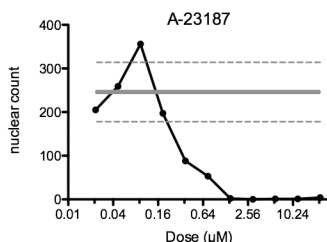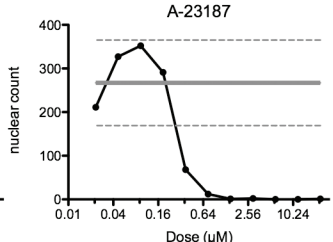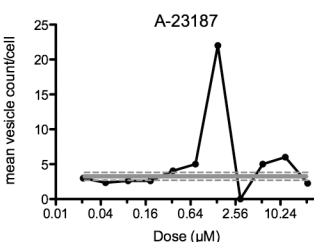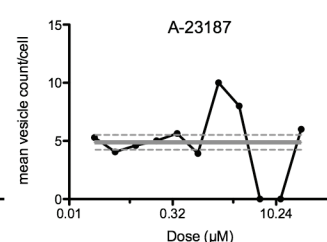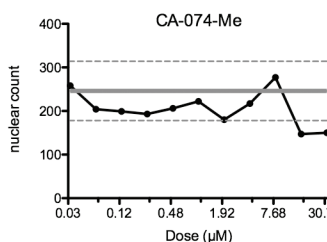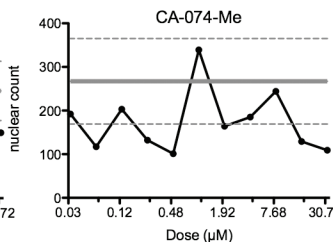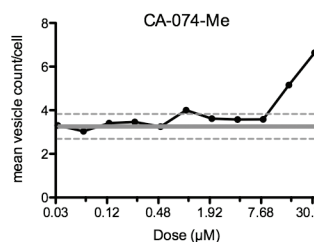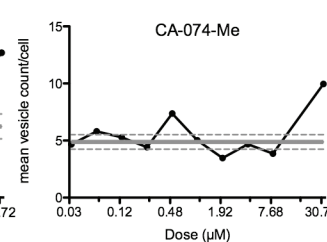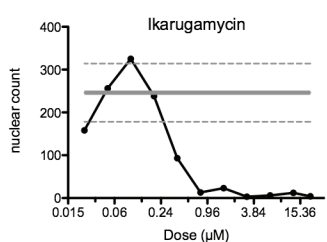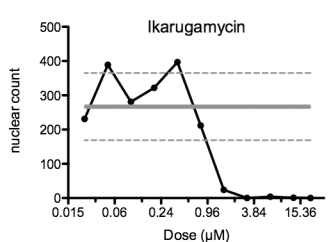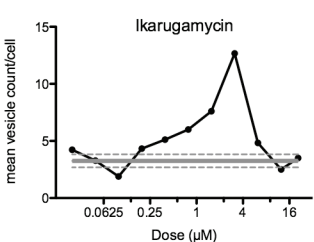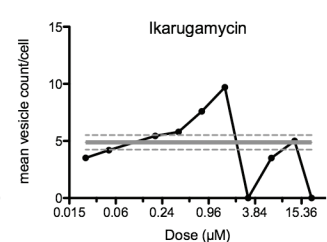

**SUPPLEMENTARY TABLES and LEGENDS**

**Supplementary Tables 1 and 2 are uploaded as separate .xls (or .xlsx) files.**

**File name: Supplementary Table 1.xlsx**

**Supplementary Table 1. Hit list from primary GFP-LC3 screen run on duplicate plates of wildtype (*CbCln3*<sup>+/+</sup>) and homozygous mutant (*CbCln3*<sup>Δex7/8/Δex7/8</sup>) cells.**

Predicted mechanism of action information was determined using the PubChem database (pubchem.ncbi.nlm.nih.gov) and/or Enzo Life Sciences (BIOMOL) supplier data (www.enzolifesciences.com).

**File name: Supplementary Table 2.xls**

**Supplementary Table 2. All compounds primary screen data.** Per plate z-scores are shown for each of the 320 compounds in the primary screen, for *CbCln3*<sup>+/+</sup> and for *CbCln3*<sup>Δex7/8/Δex7/8</sup> cells. The mean z-score for the duplicate plates is also shown for each compound in both the *CbCln3*<sup>+/+</sup> and for *CbCln3*<sup>Δex7/8/Δex7/8</sup> cells.
